# Supplementary material for: Inflammatory responses to secondary organic aerosols (SOA) generated from biogenic and anthropogenic precursors
Source: Copernicus journal article supplement (doi:10.5194/acp-17-11423-2017), 2017-09-26
Supplement: Supplementary file 1 [file acp-17-11423-2017-supplement.pdf]

Supplement of Atmos. Chem. Phys., 17, 11423–11440, 2017  
<https://doi.org/10.5194/acp-17-11423-2017-supplement>  
© Author(s) 2017. This work is distributed under  
the Creative Commons Attribution 3.0 License.

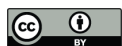

*Supplement of*

## **Inflammatory responses to secondary organic aerosols (SOA) generated from biogenic and anthropogenic precursors**

**Wing Y. Tuet et al.**

*Correspondence to:* Nga L. Ng ([ng@chbe.gatech.edu](mailto:ng@chbe.gatech.edu))

The copyright of individual parts of the supplement might differ from the CC BY 3.0 License.

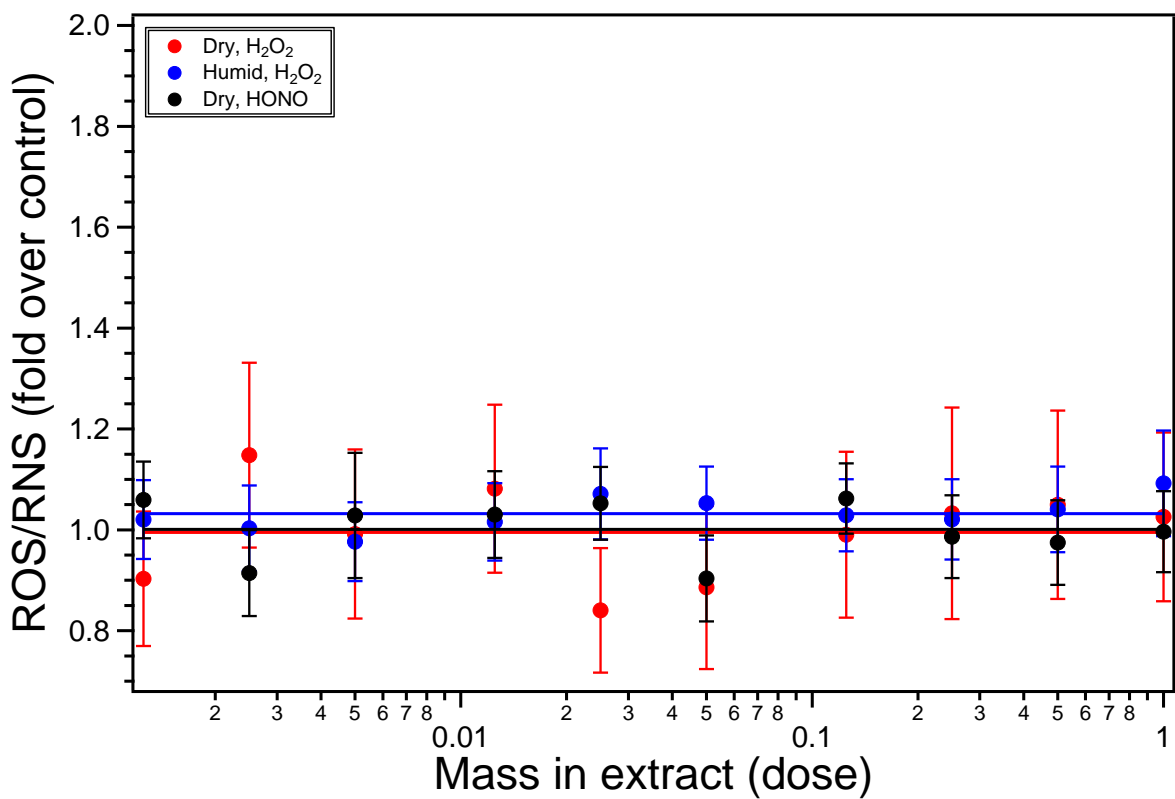

**Figure S1.** ROS/RNS produced as a result of exposure to background filters (OH precursor and seed only). ROS/RNS is expressed as a fold increase over probe-treated control cells incubated with stimulant-free media. Data shown are means  $\pm$  standard error of triplicate exposure experiments.

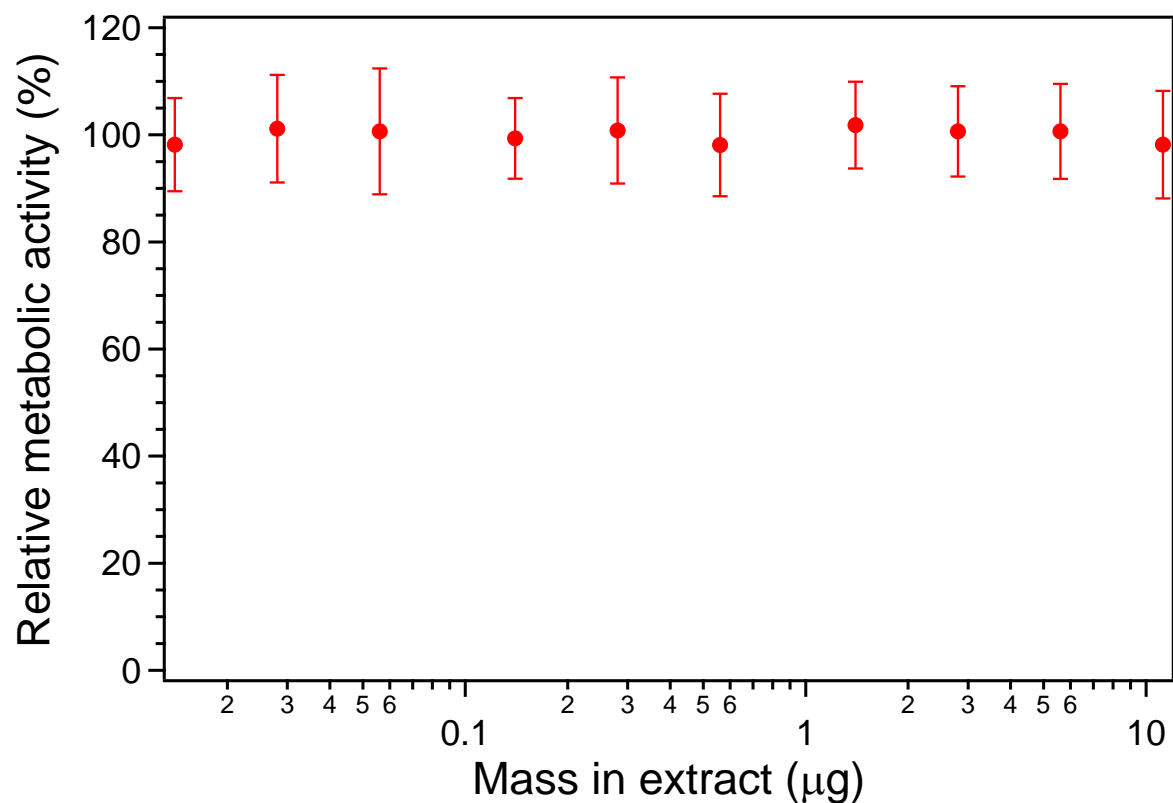

**Figure S2.** Post filter exposure cellular metabolic activity as measured by the MTT assay (filter: naphthalene SOA formed under dry, RO<sub>2</sub> + NO dominant conditions). Cellular metabolic activity is normalized to cells exposed to stimulant-free media. Data shown are means  $\pm$  standard error of triplicate exposure experiments. All filter exposures produced similar results.

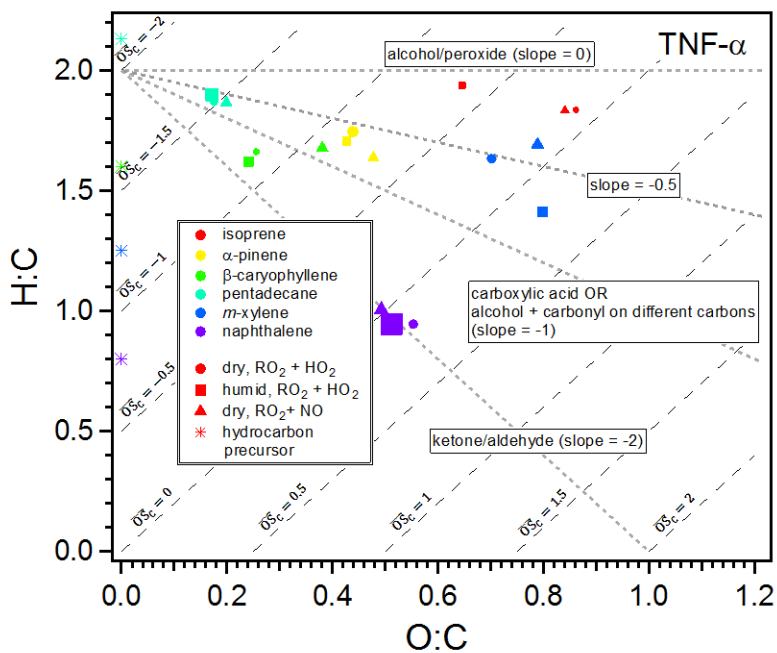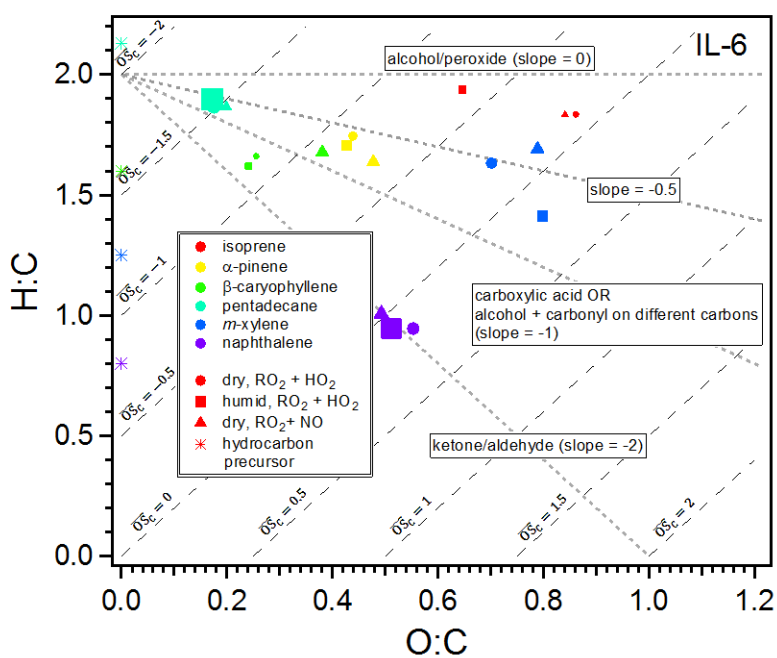

**Figure S3.** van Krevelen plot for various SOA systems. Data points are colored by SOA system (red: isoprene, yellow:  $\alpha$ -pinene, green:  $\beta$ -caryophyllene, light blue: pentadecane, blue: *m*-xylene, and purple: naphthalene), shaped according to formation conditions (circle: dry,  $RO_2 + HO_2$ ; square: humid,  $RO_2 + HO_2$ ; and triangle: dry,  $RO_2 + NO$ ), and sized by TNF- $\alpha$  and IL-6 levels. SOA precursors are shown as stars, colored by SOA system.

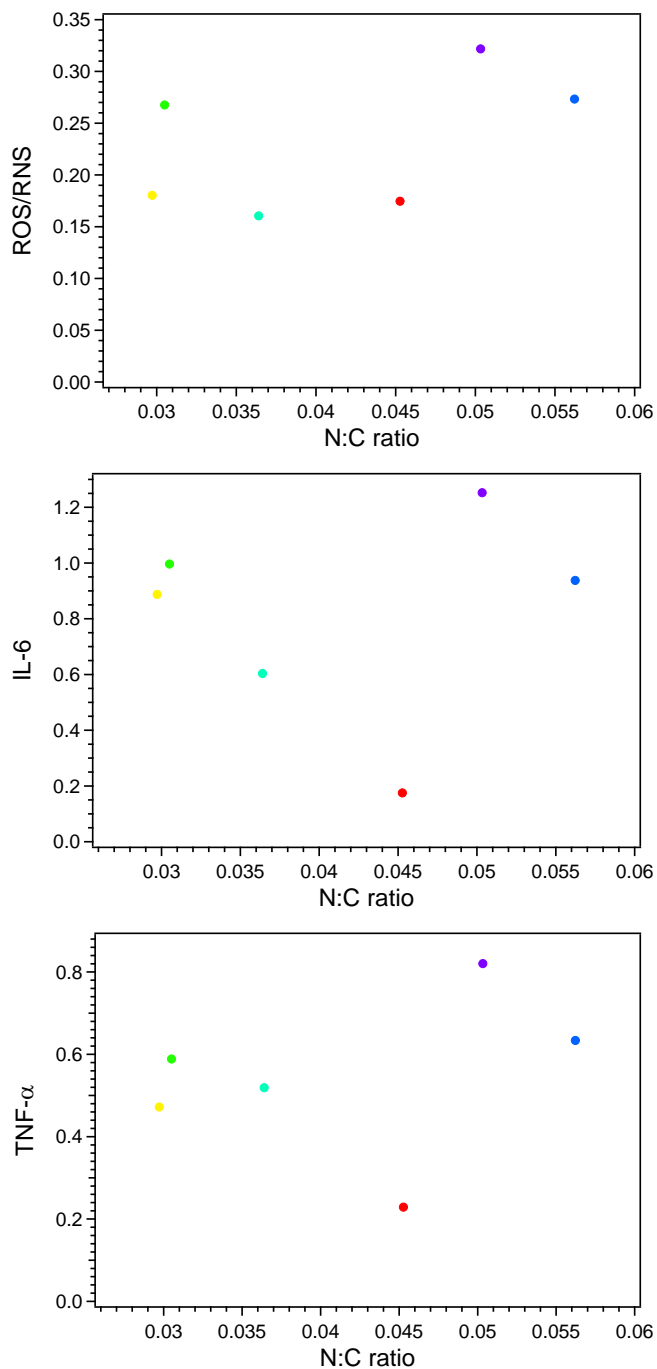

**Figure S4.** ROS/RNS, TNF- $\alpha$ , and IL-6 (represented as AUC per  $\mu\text{g}$ ) for various SOA systems spanning a wide range of N:C ratios. Data points are colored by SOA system (red: isoprene, yellow:  $\alpha$ -pinene, green:  $\beta$ -caryophyllene, light blue: pentadecane, blue: *m*-xylene, and purple: naphthalene).

**Table S1.** SOA precursor structures.

| Compound               | Structure                                                                                                                                                                                                                                                                                                                 |
|------------------------|---------------------------------------------------------------------------------------------------------------------------------------------------------------------------------------------------------------------------------------------------------------------------------------------------------------------------|
| Isoprene               | 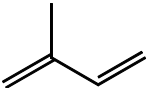 The structure of isoprene is a branched diene, specifically 2-methyl-1,3-butadiene, shown as a skeletal structure with a central carbon atom bonded to a methyl group and two vinyl groups.                                            |
| $\alpha$ -pinene       |  The structure of $\alpha$ -pinene is a bicyclic monoterpene, specifically 1,2,3,4,4,5-hexamethyl-1,2,3,4,4,5-hexahydronaphthalene, shown as a skeletal structure with a bicyclic ring system and six methyl groups.                    |
| $\beta$ -caryophyllene |  The structure of $\beta$ -caryophyllene is a bicyclic sesquiterpene, specifically 1,2,3,4,4,5,6,7,8,9,10,11,12,13,14,15-hexadecahydronaphthalene, shown as a skeletal structure with a bicyclic ring system and several methyl groups. |
| Pentadecane            |  The structure of pentadecane is a straight-chain alkane with 15 carbon atoms, shown as a zigzag skeletal structure.                                                                                                                   |
| m-xylene               |  The structure of m-xylene is a benzene ring with two methyl groups attached at the meta position, shown as a skeletal structure.                                                                                                     |
| Naphthalene            |  The structure of naphthalene is a polycyclic aromatic hydrocarbon consisting of two fused benzene rings, shown as a skeletal structure.                                                                                              |
